# Supplementary material for: Nitrate and Ammonium Affect the Overall Maize Response to Nitrogen Availability by Triggering Specific and Common Transcriptional Signatures in Roots
Source: MDPI journal article supplement (doi:10.3390/ijms21020686), 2020-01-20
Supplement: s1 [file s1]

**Table S9.** Amino acid transitions for HILIC-MS/MS quantification.

| <b>Compound</b>      | <b>Polarity</b> | <b>Q1</b> | <b>Q3</b> | <b>Capillary</b> | <b>Collision</b> | <b>Dwell Time</b> |
|----------------------|-----------------|-----------|-----------|------------------|------------------|-------------------|
| <b>Glycine</b>       | Pos.            | 76.00     | 30.30     | 40.000           | 8.000            | 0.1               |
| <b>Alanine</b>       | Pos.            | 90.00     | 44.50     | 40.000           | 8.000            | 0.1               |
| <b>Serine</b>        | Pos.            | 106.00    | 60.40     | 30.000           | 8.500            | 0.1               |
| <b>Proline</b>       | Pos.            | 116.00    | 70.30     | 40.000           | 10.500           | 0.1               |
| <b>Valine</b>        | Pos.            | 118.00    | 72.40     | 30.000           | 8.500            | 0.1               |
| <b>Threonine</b>     | Pos.            | 120.00    | 74.40     | 30.000           | 8.000            | 0.1               |
| <b>Cystine</b>       | Pos.            | 122.00    | 75.70     | 30.000           | 11.500           | 0.1               |
| <b>Isoleucine</b>    | Pos.            | 132.00    | 86.50     | 40.000           | 7.000            | 0.1               |
| <b>Leucine</b>       | Pos.            | 132.00    | 86.50     | 40.000           | 7.500            | 0.1               |
| <b>Asparagine</b>    | Pos.            | 133.00    | 87.40     | 40.000           | 6.500            | 0.1               |
| <b>Aspartic Acid</b> | Pos.            | 134.00    | 74.30     | 33.876           | 12.000           | 0.1               |
| <b>Glutamine</b>     | Pos.            | 147.00    | 84.40     | 30.000           | 14.000           | 0.1               |
| <b>Lysine</b>        | Pos.            | 147.10    | 84.40     | 30.000           | 13.500           | 0.1               |
| <b>Glutamic Acid</b> | Pos.            | 148.00    | 83.70     | 30.000           | 13.000           | 0.1               |
| <b>Methionine</b>    | Pos.            | 150.00    | 133.40    | 38.318           | 6.000            | 0.1               |
| <b>Histidine</b>     | Pos.            | 156.10    | 110.00    | 40.000           | 9.500            | 0.1               |
| <b>Phenylalanine</b> | Pos.            | 166.10    | 119.60    | 40.000           | 9.500            | 0.1               |
| <b>Arginine</b>      | Pos.            | 175.10    | 70.40     | 40.000           | 18.000           | 0.1               |
| <b>Tyrosine</b>      | Pos.            | 182.10    | 135.60    | 40.000           | 10.000           | 0.1               |
| <b>Tryptophan</b>    | Pos.            | 205.10    | 187.60    | 40.000           | 7.000            | 0.1               |
