# Supplementary material for: Nitrate and Ammonium Affect the Overall Maize Response to Nitrogen Availability by Triggering Specific and Common Transcriptional Signatures in Roots
Source: MDPI journal article supplement (doi:10.3390/ijms21020686), 2020-01-20

**Figure S1:** Percentage of differentially expressed genes (DEGs) identified ( $\log_2 \text{FC} > |0.58|$ ;  $\text{FDR} \leq 0.05$ ) by RNA-Seq analysis from the comparison between  $\text{NO}_3^-$  or  $\text{NH}_4^+$  supplied maize seedlings for 24 h with respect to the control (-N, nitrogen deficient solution). Data are shown as percentage of genes differentially expressed in response to each treatment in  $+\text{NO}_3^-$  (A) and  $+\text{NH}_4^+$  (B) treatments on the total amount of DEGs. DEGs were classified as up-regulated according to their  $\log_2$  fold change values (a  $\log_2\text{FC}$  threshold  $> |0.58|$  was set, corresponding to a 1.5-fold change increase or decrease in expression). Among the up- and downregulated DEGs, several ranges of induction or repression are shown as  $\log_2$  of the gene expression fold changes.

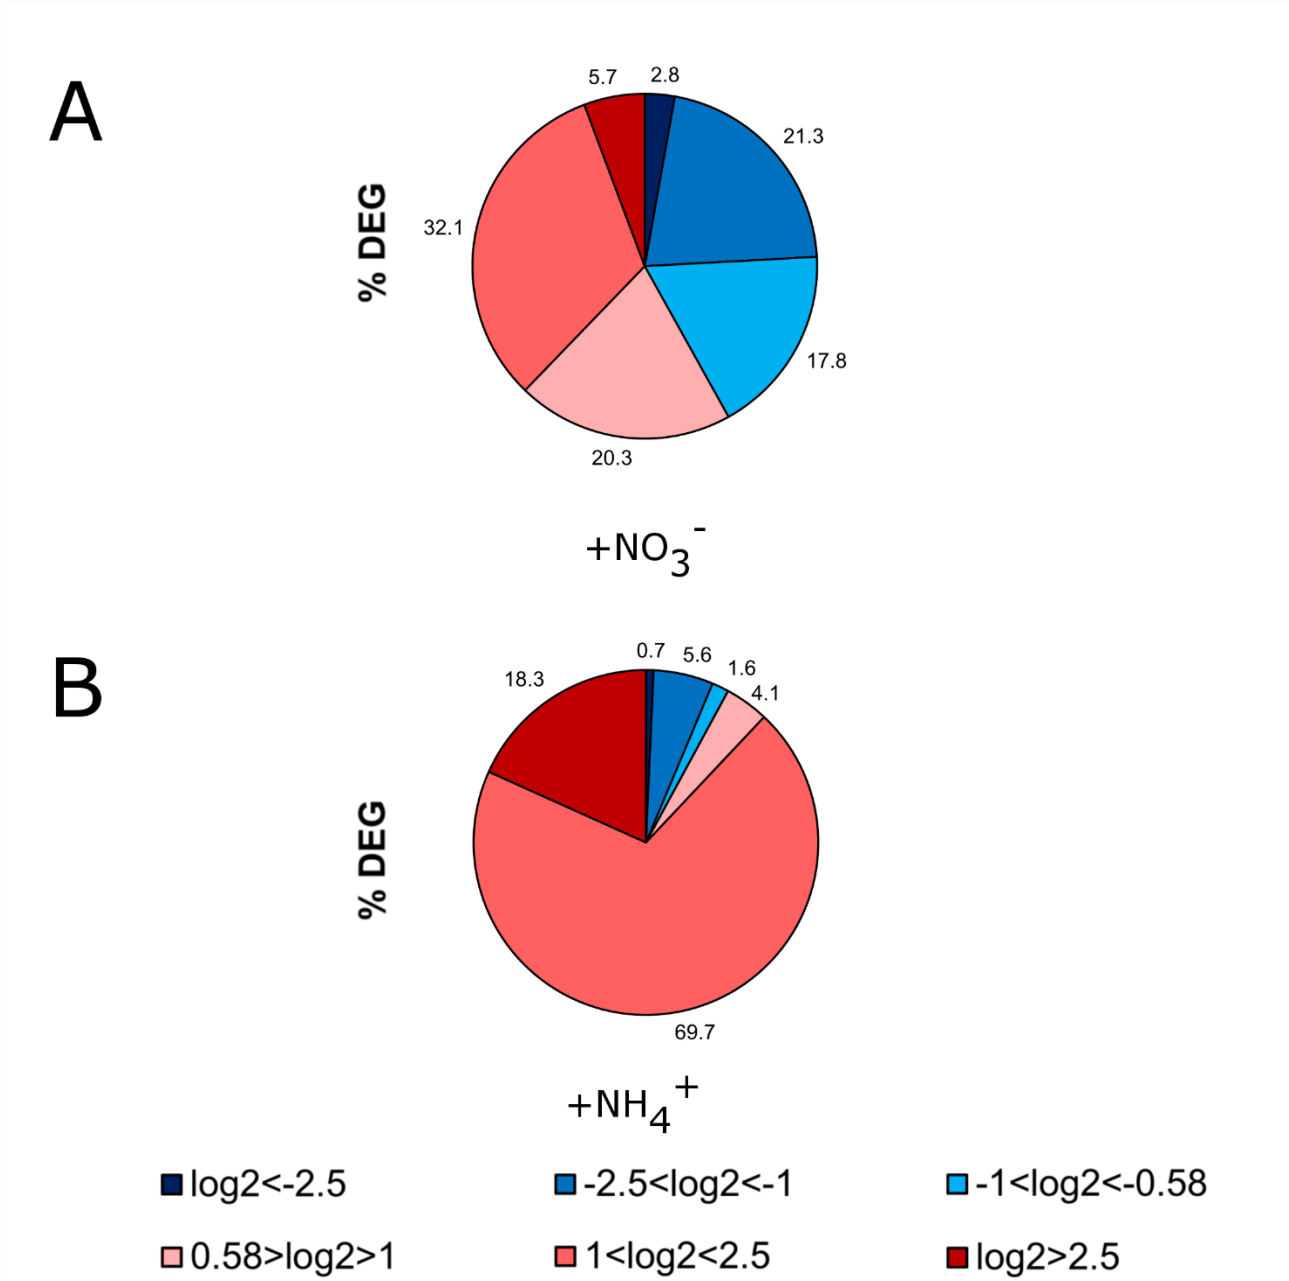

Supplement: s1 [file s1]
