# Supplementary material for: Nitrate and Ammonium Affect the Overall Maize Response to Nitrogen Availability by Triggering Specific and Common Transcriptional Signatures in Roots
Source: MDPI journal article supplement (doi:10.3390/ijms21020686), 2020-01-20
Supplement: s1 [file s1]

**Table S7.** Complete quantification for all free amino acids detected as average of  $\mu\text{g/g}$  of weighted tissue  $\pm$  SE and the proportion of total amino acids (%). **TOT:** calculated sum of total amino acids.  **$\Delta\%$  -N:** calculated percentage increase/decrease of total free amino acids detected in each treatment ( $+\text{NO}_3^-$  or  $+\text{NH}_4^+$ ) with respect to the N-deficient treatment (-N). The asterisk indicates significant differences with respect to -N treatments (Student's t-test with: \*\*  $p \leq 0.01$ , \*  $p \leq 0.05$ ).

|                                 | <b>-N ROOT</b>                    |             |            | <b><math>+\text{NO}_3^-</math> ROOT</b> |             |               |          | <b><math>+\text{NH}_4^+</math> ROOT</b> |             |              |          | <b>-N LEAVES</b>                  |             |            | <b><math>+\text{NO}_3^-</math> LEAVES</b> |             |               |          | <b><math>+\text{NH}_4^+</math> LEAVES</b> |             |                |          |
|---------------------------------|-----------------------------------|-------------|------------|-----------------------------------------|-------------|---------------|----------|-----------------------------------------|-------------|--------------|----------|-----------------------------------|-------------|------------|-------------------------------------------|-------------|---------------|----------|-------------------------------------------|-------------|----------------|----------|
| <b>FREE AA</b>                  | <b><math>\mu\text{g/g}</math></b> | <b>SE</b>   | <b>%</b>   | <b><math>\mu\text{g/g}</math></b>       | <b>SE</b>   | <b>%</b>      | <b>p</b> | <b><math>\mu\text{g/g}</math></b>       | <b>SE</b>   | <b>%</b>     | <b>p</b> | <b><math>\mu\text{g/g}</math></b> | <b>SE</b>   | <b>%</b>   | <b><math>\mu\text{g/g}</math></b>         | <b>SE</b>   | <b>%</b>      | <b>p</b> | <b><math>\mu\text{g/g}</math></b>         | <b>SE</b>   | <b>%</b>       | <b>p</b> |
| GLY                             | 1.72                              | 0.30        | 1.53       | 1.73                                    | 0.28        | 1.77          |          | 2.62                                    | 0.27        | 2.45         |          | 1.53                              | 0.29        | 1.82       | 1.99                                      | 0.21        | 1.85          |          | 2.46                                      | 0.21        | 1.30           |          |
| ALA                             | 28.08                             | 0.19        | 25.06      | 20.15                                   | 0.15        | 20.57         | *        | 22.01                                   | 0.21        | 20.56        | *        | 14.72                             | 0.15        | 17.58      | 23.23                                     | 0.19        | 21.58         | *        | 40.65                                     | 0.37        | 21.58          | *        |
| SER                             | 2.04                              | 0.29        | 1.82       | 1.19                                    | 0.27        | 1.22          | **       | 1.28                                    | 0.35        | 1.20         | **       | 3.53                              | 0.27        | 4.22       | 6.38                                      | 0.42        | 5.93          | **       | 6.33                                      | 0.42        | 3.36           | **       |
| PRO                             | 1.70                              | 0.17        | 1.52       | 2.45                                    | 0.13        | 2.50          | **       | 1.19                                    | 0.09        | 1.11         | **       | 3.03                              | 0.18        | 3.62       | 5.03                                      | 0.16        | 4.67          | **       | 9.35                                      | 0.12        | 4.97           | **       |
| VAL                             | 12.88                             | 0.52        | 11.50      | 11.25                                   | 0.47        | 11.49         | **       | 14.20                                   | 0.58        | 13.26        | **       | 8.93                              | 0.41        | 10.66      | 14.06                                     | 0.69        | 13.06         | **       | 23.99                                     | 0.92        | 12.74          | **       |
| THR                             | 2.05                              | 0.12        | 1.83       | 2.09                                    | 0.12        | 2.14          | **       | 2.46                                    | 0.19        | 2.30         | **       | 1.21                              | 0.18        | 1.45       | 1.56                                      | 0.19        | 1.45          | **       | 4.23                                      | 0.23        | 2.24           | **       |
| CYS                             | 0.76                              | 0.06        | 0.68       | 0.44                                    | 0.06        | 0.45          |          | 0.12                                    | 0.00        | 0.11         |          | 0.43                              | 0.03        | 0.51       | 0.42                                      | 0.03        | 0.39          |          | 0.75                                      | 0.09        | 0.40           |          |
| LEU/ILE                         | 16.13                             | 0.73        | 14.40      | 15.61                                   | 0.54        | 15.94         | **       | 8.49                                    | 0.29        | 7.93         | **       | 2.87                              | 0.27        | 3.43       | 3.64                                      | 0.37        | 3.38          | **       | 9.15                                      | 0.60        | 4.86           | **       |
| ASN                             | 7.31                              | 0.44        | 6.52       | 0.93                                    | 0.17        | 0.95          | *        | 6.90                                    | 0.44        | 6.44         | *        | 9.39                              | 0.58        | 11.21      | 12.57                                     | 1.04        | 11.68         | *        | 29.68                                     | 2.19        | 15.76          | *        |
| ASP                             | 1.99                              | 0.19        | 1.78       | 1.89                                    | 0.27        | 1.93          |          | 1.56                                    | 0.31        | 1.46         |          | 1.97                              | 0.42        | 2.35       | 3.02                                      | 0.67        | 2.81          |          | 7.04                                      | 0.71        | 3.74           |          |
| GLN                             | 0.91                              | 0.18        | 0.81       | 0.49                                    | 0.14        | 0.50          | *        | 0.21                                    | 0.04        | 0.19         | *        | 0.46                              | 0.06        | 0.55       | 0.37                                      | 0.06        | 0.35          | *        | 0.66                                      | 0.19        | 0.35           | *        |
| GLU                             | 3.79                              | 0.39        | 3.38       | 6.38                                    | 0.48        | 6.51          | **       | 11.28                                   | 1.21        | 10.54        | **       | 6.24                              | 12.90       | 7.45       | 8.56                                      | 12.77       | 7.95          | **       | 14.00                                     | 0.55        | 7.44           | **       |
| LYS                             | 0.60                              | 0.08        | 0.53       | 0.24                                    | 0.07        | 0.25          |          | 0.53                                    | 0.08        | 0.50         |          | 0.50                              | 0.08        | 0.59       | 0.22                                      | 0.06        | 0.21          |          | 1.40                                      | 0.08        | 0.74           |          |
| MET                             | 5.83                              | 0.54        | 5.20       | 4.77                                    | 0.80        | 4.87          | **       | 5.64                                    | 1.42        | 5.27         | **       | 9.53                              | 1.06        | 11.38      | 6.39                                      | 0.39        | 5.94          | **       | 22.15                                     | 1.52        | 11.76          | **       |
| HIS                             | 1.44                              | 0.08        | 1.28       | 4.19                                    | 0.21        | 4.28          | **       | 0.63                                    | 0.17        | 0.59         | **       | 0.48                              | 0.10        | 0.57       | 0.50                                      | 0.13        | 0.47          | **       | 0.42                                      | 0.06        | 0.22           | **       |
| PHE                             | 2.26                              | 0.32        | 2.02       | 2.04                                    | 0.45        | 2.08          |          | 1.35                                    | 0.24        | 1.26         |          | 5.37                              | 0.69        | 6.41       | 4.19                                      | 0.78        | 3.90          |          | 5.65                                      | 0.98        | 3.00           |          |
| ARG                             | 2.83                              | 0.15        | 2.53       | 4.60                                    | 0.23        | 4.69          | **       | 3.60                                    | 0.22        | 3.37         | **       | 0.12                              | 0.07        | 0.14       | 0.13                                      | 0.05        | 0.12          | **       | 0.15                                      | 0.06        | 0.08           | **       |
| TYR                             | 18.81                             | 1.25        | 16.78      | 16.66                                   | 0.79        | 17.01         | **       | 21.91                                   | 1.10        | 20.46        | **       | 12.81                             | 0.72        | 15.29      | 14.63                                     | 0.75        | 13.59         | **       | 9.79                                      | 0.62        | 5.20           | **       |
| TRP                             | 0.94                              | 0.05        | 0.84       | 0.83                                    | 0.04        | 0.85          | **       | 1.10                                    | 0.05        | 1.02         | **       | 0.64                              | 0.04        | 0.76       | 0.73                                      | 0.03        | 0.68          | **       | 0.49                                      | 0.03        | 0.26           | **       |
| <b>TOT</b>                      | <b>112.06</b>                     | <b>1.70</b> | <b>100</b> | <b>97.94</b>                            | <b>1.37</b> | <b>100</b>    |          | <b>107.06</b>                           | <b>1.56</b> | <b>100</b>   |          | <b>83.75</b>                      | <b>1.02</b> | <b>100</b> | <b>107.62</b>                             | <b>1.42</b> | <b>100</b>    |          | <b>188.34</b>                             | <b>2.55</b> | <b>100</b>     |          |
| <b><math>\Delta\%</math> -N</b> |                                   |             |            |                                         |             | <b>-12.6%</b> |          |                                         |             | <b>-4.5%</b> |          |                                   |             |            |                                           |             | <b>+28.5%</b> |          |                                           |             | <b>+124.9%</b> |          |

**Table S8.** Complete quantification for all hydrolysed amino acids detected as average of  $\mu\text{g/g}$  of weighted tissue  $\pm$  SE and the proportion of total amino acids (%). **TOT:** calculated sum of total amino acids.  **$\Delta\%$  -N:** calculated percentage increase/decrease of total hydrolysed amino acids detected in each treatment ( $+\text{NO}_3^-$  or  $+\text{NH}_4^+$ ) with respect to the N-deficient treatment (-N). The asterisk indicates significant differences with respect to -N treatments (Student's t-test with: \*\*  $p \leq 0.01$ , \*  $p \leq 0.05$ ).

|                                 | <b>-N ROOT</b>                    |           |          | <b><math>+\text{NO}_3^-</math> ROOT</b> |           |               |          | <b><math>+\text{NH}_4^+</math> ROOT</b> |           |              |          | <b>-N LEAVES</b>                  |           |          | <b><math>+\text{NO}_3^-</math> LEAVES</b> |           |               |          | <b><math>+\text{NH}_4^+</math> LEAVES</b> |           |               |          |
|---------------------------------|-----------------------------------|-----------|----------|-----------------------------------------|-----------|---------------|----------|-----------------------------------------|-----------|--------------|----------|-----------------------------------|-----------|----------|-------------------------------------------|-----------|---------------|----------|-------------------------------------------|-----------|---------------|----------|
| <b>HYDR.AA</b>                  | <b><math>\mu\text{g/g}</math></b> | <b>SE</b> | <b>%</b> | <b><math>\mu\text{g/g}</math></b>       | <b>SE</b> | <b>%</b>      | <b>p</b> | <b><math>\mu\text{g/g}</math></b>       | <b>SE</b> | <b>%</b>     | <b>p</b> | <b><math>\mu\text{g/g}</math></b> | <b>SE</b> | <b>%</b> | <b><math>\mu\text{g/g}</math></b>         | <b>SE</b> | <b>%</b>      | <b>p</b> | <b><math>\mu\text{g/g}</math></b>         | <b>SE</b> | <b>%</b>      | <b>p</b> |
| GLY                             | 57.30                             | 0.90      | 0.70     | 41.68                                   | 0.96      | 0.63          | **       | 29.96                                   | 1.54      | 0.39         | **       | 28.15                             | 1.15      | 0.44     | 18.53                                     | 0.58      | 0.43          | **       | 15.81                                     | 0.77      | 0.76          | **       |
| ALA                             | 1042.81                           | 2.50      | 12.68    | 390.80                                  | 1.73      | 5.92          | **       | 569.89                                  | 1.35      | 7.45         | **       | 228.59                            | 1.15      | 3.54     | 112.12                                    | 1.54      | 2.57          | **       | 80.18                                     | 1.54      | 3.85          | **       |
| SER                             | 100.63                            | 3.66      | 1.22     | 69.68                                   | 2.69      | 1.06          | **       | 52.01                                   | 1.69      | 0.68         | **       | 16.25                             | 1.35      | 0.25     | 13.07                                     | 0.96      | 0.30          | **       | 9.25                                      | 0.96      | 0.44          | **       |
| PRO                             | 607.75                            | 15.20     | 7.39     | 573.04                                  | 14.4      | 8.68          | **       | 395.29                                  | 14.24     | 5.17         | **       | 191.54                            | 8.47      | 2.96     | 183.43                                    | 7.51      | 4.21          | **       | 70.01                                     | 8.47      | 3.36          | **       |
| VAL                             | 296.47                            | 12.32     | 3.61     | 218.82                                  | 9.24      | 3.32          | **       | 100.84                                  | 7.31      | 1.32         | **       | 125.04                            | 5.97      | 1.93     | 96.78                                     | 5.39      | 2.22          | **       | 22.17                                     | 5.20      | 1.06          | **       |
| THR                             | 122.03                            | 6.74      | 1.48     | 123.47                                  | 6.16      | 1.87          | **       | 53.92                                   | 2.89      | 0.70         | **       | 39.82                             | 1.44      | 0.62     | 34.67                                     | 1.35      | 0.80          | **       | 12.03                                     | 1.54      | 0.58          | **       |
| CYS                             | 3280.00                           | 14.63     | 39.88    | 3024.74                                 | 13.4      | 45.83         | *        | 4927.87                                 | 14.05     | 64.40        | *        | 4474.61                           | 7.51      | 69.22    | 2559.45                                   | 4.23      | 58.73         | *        | 1327.59                                   | 5.39      | 63.71         | *        |
| LEU/ILE                         | 673.41                            | 11.74     | 8.19     | 530.62                                  | 12.3      | 8.04          | **       | 303.73                                  | 7.89      | 3.97         | **       | 288.61                            | 4.62      | 4.46     | 291.66                                    | 3.27      | 6.69          | **       | 106.46                                    | 2.12      | 5.11          | **       |
| ASP                             | 36.47                             | 1.15      | 0.44     | 29.97                                   | 1.15      | 0.45          | **       | 9.93                                    | 0.77      | 0.13         | **       | 6.89                              | 0.58      | 0.11     | 10.43                                     | 0.64      | 0.24          | **       | 1.59                                      | 0.13      | 0.08          | **       |
| ASP.a                           | 23.04                             | 0.58      | 0.28     | 16.13                                   | 0.31      | 0.24          | **       | 4.85                                    | 0.12      | 0.06         | **       | 3.91                              | 0.27      | 0.06     | 5.56                                      | 0.25      | 0.13          | **       | 0.93                                      | 0.06      | 0.04          | **       |
| GLU                             | 44.65                             | 0.60      | 0.54     | 20.05                                   | 0.77      | 0.30          | *        | 9.51                                    | 0.44      | 0.12         | *        | 17.13                             | 0.50      | 0.27     | 18.89                                     | 0.38      | 0.43          | *        | 13.08                                     | 0.31      | 0.63          | *        |
| LYS                             | 8.05                              | 0.17      | 0.10     | 4.28                                    | 0.17      | 0.06          | **       | 2.18                                    | 0.12      | 0.03         | **       | 3.97                              | 0.13      | 0.06     | 3.87                                      | 0.06      | 0.09          | **       | 2.67                                      | 0.10      | 0.13          | **       |
| MET                             | 68.42                             | 1.54      | 0.83     | 93.65                                   | 5.58      | 1.42          | **       | 44.02                                   | 1.35      | 0.58         | **       | 14.87                             | 0.77      | 0.23     | 24.43                                     | 0.96      | 0.56          | **       | 7.67                                      | 0.58      | 0.37          | **       |
| HIS                             | 922.69                            | 5.00      | 11.22    | 821.18                                  | 4.81      | 12.44         | **       | 499.59                                  | 1.15      | 6.53         | **       | 444.92                            | 1.15      | 6.88     | 445.25                                    | 0.77      | 10.22         | **       | 132.01                                    | 0.58      | 6.33          | **       |
| PHE                             | 278.06                            | 0.77      | 3.38     | 173.53                                  | 0.77      | 2.63          | *        | 212.14                                  | 0.96      | 2.77         | *        | 216.69                            | 1.35      | 3.35     | 243.98                                    | 0.96      | 5.60          | *        | 194.58                                    | 0.46      | 9.34          | *        |
| ARG                             | 632.21                            | 1.20      | 7.69     | 446.18                                  | 0.85      | 6.76          | **       | 421.51                                  | 0.58      | 5.51         | **       | 350.91                            | 0.63      | 5.43     | 285.49                                    | 0.29      | 6.55          | **       | 80.46                                     | 0.21      | 3.86          | **       |
| TRP                             | 29.73                             | 0.08      | 0.36     | 21.63                                   | 0.06      | 0.33          | **       | 14.82                                   | 0.03      | 0.19         | **       | 12.45                             | 0.04      | 0.19     | 10.06                                     | 0.02      | 0.23          | **       | 7.47                                      | 0.01      | 0.36          | **       |
| <b>TOT</b>                      | 8223.72                           | 187.3     | 100      | 6599.45                                 | 170       | 100           |          | 7652.066                                | 275.3     | 100          |          | 6464.362                          | 250.4     | 100      | 4357.65                                   | 143.1     | 100           |          | 2083.95                                   | 74.2      | 100           |          |
| <b><math>\Delta\%</math> -N</b> |                                   |           |          |                                         |           | <b>-19.7%</b> |          |                                         |           | <b>-6.9%</b> |          |                                   |           |          |                                           |           | <b>-32.6%</b> |          |                                           |           | <b>-67.8%</b> |          |
