# Supplementary material for: Nitrate and Ammonium Affect the Overall Maize Response to Nitrogen Availability by Triggering Specific and Common Transcriptional Signatures in Roots
Source: MDPI journal article supplement (doi:10.3390/ijms21020686), 2020-01-20
Supplement: s1 [file s1]

**Table S3:** List of some selected differentially expressed genes (DEGs) showing a log2 fold change ratio  $>|0.58|$  and a false discovery rate (FDR)-adjusted p-value  $\leq 0.05$  in at least one treatment that are related to N transport and metabolism. RPKM (Reads Per Kb per Million) expression values in +NO<sub>3</sub><sup>-</sup>, -N and +NH<sub>4</sub><sup>+</sup> samples, hierarchical clustering results and log2 fold change ratio are reported.

| Gene_description                                              | Gene_id        | RPKM                          |          |                               | Cluster | log2 +NO <sub>3</sub> <sup>-</sup> /-N | log2 +NH <sub>4</sub> <sup>+</sup> /-N |
|---------------------------------------------------------------|----------------|-------------------------------|----------|-------------------------------|---------|----------------------------------------|----------------------------------------|
|                                                               |                | +NO <sub>3</sub> <sup>-</sup> | -N       | +NH <sub>4</sub> <sup>+</sup> |         |                                        |                                        |
| Ammonium transporter 2                                        | Zm00001d034782 | 2.94596                       | 8.57231  | 8.49429                       | 7       | -1.54095                               | -0.01319                               |
| Ammonium transporter 2                                        | Zm00001d016771 | 4.31905                       | 3.89863  | 9.26185                       | 1       | 0.147746                               | 1.248333                               |
| ammonium transporter 1, ZmAMT1;1a                             | Zm00001d025831 | 3.91086                       | 8.7152   | 19.4092                       | 7       | -1.15605                               | 1.155135                               |
| Ammonium transporter 1                                        | Zm00001d025831 | 3.91086                       | 8.7152   | 19.4092                       | 7       | -1.15605                               | 1.155135                               |
| Ammonium transporter 2                                        | Zm00001d017249 | 0.644629                      | 2.81132  | 3.23104                       | 7       | -2.12471                               | 0.200751                               |
| Ammonium transporter 2                                        | Zm00001d017249 | 0.644629                      | 2.81132  | 3.23104                       | 7       | -2.12471                               | 0.200751                               |
| Ferredoxin-6, chloroplastic Precursor (Ferredoxin VI) (Fd VI) | Zm00001d038291 | 37.1851                       | 10.1148  | 34.5976                       | 3       | 1.87826                                | 1.774204                               |
| Ferredoxin--NADP reductase root isozyme 1 chloroplastic       | Zm00001d034345 | 110.226                       | 52.267   | 83.73                         | 3       | 1.07649                                | 0.679844                               |
| Ferredoxin--nitrite reductase chloroplastic                   | Zm00001d018161 | 16.3465                       | 0.820326 | 16.7096                       | 3       | 4.31664                                | 4.348336                               |
| glucose-6-phosphate translocator                              | Zm00001d021653 | 3.54728                       | 0.996285 | 1.10639                       | 5       | 1.83208                                | 0.15123                                |
| Glutamine synthetase leaf isozyme chloroplastic               | Zm00001d026501 | 13.5914                       | 4.93134  | 6.99464                       | 5       | 1.46264                                | 0.50427                                |
| Hemoglobin 1                                                  | Zm00001d048020 | 300.534                       | 33.1356  | 228.802                       | 3       | 3.18107                                | 2.787646                               |
| Hemoglobin 2                                                  | Zm00001d038718 | 5.72224                       | 0.313381 | 0.830336                      | 5       | 4.19059                                | 1.405778                               |
| NRa - nitrate reductase (NADH)1                               | Zm00001d049995 | 1.77204                       | 0.291422 | 1.69453                       | 3       | 2.60423                                | 2.539703                               |
| Urea-proton symporter DUR3                                    | Zm00001d037242 | 0.143906                      | 0.666156 | 1.07956                       | 7       | -2.21073                               | 0.696511                               |
| ZmNRT1a, nitrate transporter/peptide transporter family 2     | Zm00001d029932 | 27.3563                       | 17.7566  | 22.7131                       | 3       | 0.623519                               | 0.355169                               |
| ZmNRT1b, protein NRT1/ PTR FAMILY 4.6                         | Zm00001d036941 | 1.58251                       | 1.28707  | 3.78195                       | 1       | 0.298119                               | 1.55504                                |
