# Supplementary material for: Nitrate and Ammonium Affect the Overall Maize Response to Nitrogen Availability by Triggering Specific and Common Transcriptional Signatures in Roots
Source: MDPI journal article supplement (doi:10.3390/ijms21020686), 2020-01-20
Supplement: s1 [file s1]

**Table S1. Summary of reads obtained by RNA-Seq analysis.** For each treatment (+NO<sub>3</sub><sup>-</sup>, +NH<sub>4</sub><sup>+</sup>) or control condition (-N), three biological replicates were processed (R1, R2, R3).

| Result                   | -N libraries |        |          |        |          |        |
|--------------------------|--------------|--------|----------|--------|----------|--------|
|                          | R1           |        | R2       |        | R3       |        |
| N° of total reads        | 26357768     |        | 27157883 |        | 30178515 |        |
| N° of high-quality reads | 26254402     | 99.61% | 27051232 | 99.61% | 30045802 | 99.56% |
| N° of mapped reads       | 25805014     | 98.29% | 26614982 | 98.39% | 29474225 | 98.10% |
| Uniquely mapped reads    | 23890148     | 92.58% | 24711441 | 92.85% | 26654323 | 90.43% |
| Multi-mapped reads       | 1914866      | 7.42%  | 1903541  | 7.15%  | 2819902  | 9.57%  |
| Unmapped reads           | 103366       | 1.71%  | 106651   | 1.61%  | 132713   | 1.90%  |

  

| Result                   | +NO <sub>3</sub> <sup>-</sup> libraries |        |          |        |          |        |
|--------------------------|-----------------------------------------|--------|----------|--------|----------|--------|
|                          | R1                                      |        | R2       |        | R3       |        |
| N° of total reads        | 26061640                                |        | 32597592 |        | 28820292 |        |
| N° of high-quality reads | 25946454                                | 99.56% | 32459506 | 99.58% | 28694329 | 99.56% |
| N° of mapped reads       | 25477079                                | 98.19% | 31900192 | 98.28% | 28073982 | 97.84% |
| Uniquely mapped reads    | 23203264                                | 91.08% | 28856879 | 90.46% | 24892495 | 88.67% |
| Multi-mapped reads       | 2273815                                 | 8.92%  | 3043313  | 9.54%  | 3181487  | 11.33% |
| Unmapped reads           | 115186                                  | 1.81%  | 138086   | 1.72%  | 125963   | 2.16%  |

  

| Result                   | +NH <sub>4</sub> <sup>+</sup> libraries |        |          |        |          |        |
|--------------------------|-----------------------------------------|--------|----------|--------|----------|--------|
|                          | R1                                      |        | R2       |        | R3       |        |
| N° of total reads        | 35121464                                |        | 25513916 |        | 23264596 |        |
| N° of high-quality reads | 34934389                                | 99.47% | 25352921 | 99.37% | 23145412 | 99.49% |
| N° of mapped reads       | 34296996                                | 98.18% | 24704601 | 97.44% | 22609271 | 97.68% |
| Uniquely mapped reads    | 31201251                                | 90.97% | 22009628 | 89.09% | 20703717 | 91.57% |
| Multi-mapped reads       | 3095745                                 | 9.03%  | 2694973  | 10.91% | 1905554  | 8.43%  |
| Unmapped reads           | 187075                                  | 1.82%  | 160995   | 2.56%  | 119184   | 2.32%  |
