# Supplementary material for: Nitrate and Ammonium Affect the Overall Maize Response to Nitrogen Availability by Triggering Specific and Common Transcriptional Signatures in Roots
Source: MDPI journal article supplement (doi:10.3390/ijms21020686), 2020-01-20
Supplement: s1 [file s1]

**Table S4:** List of representative genes from selected GO terms overrepresented among DEGs specifically responsive to NH<sub>4</sub><sup>+</sup>. RPKM: Reads Per Kb per Million.

| CLUSTER 1: genes up-regulated by NH <sub>4</sub> <sup>+</sup> |                     |                |                                                    |                                       |            |                                       |
|---------------------------------------------------------------|---------------------|----------------|----------------------------------------------------|---------------------------------------|------------|---------------------------------------|
| GO ID                                                         | GO enriched term    | Gene ID        | Gene Description                                   | RPKM<br>+NO <sub>3</sub> <sup>-</sup> | RPKM<br>-N | RPKM<br>+NH <sub>4</sub> <sup>+</sup> |
| GO:0009725                                                    | response to hormone | Zm00001d011208 | 1-aminocyclopropane-1-carboxylate oxidase 1        | 187.99                                | 115.85     | 438.95                                |
|                                                               |                     | Zm00001d019078 | AAA-ATPase ASD mitochondrial                       | 28.80                                 | 12.73      | 104.28                                |
|                                                               |                     | Zm00001d052493 | Aluminium induced protein with YGL and LRDR motifs | 194.17                                | 130.31     | 438.88                                |
|                                                               |                     | Zm00001d022581 | AMP deaminase                                      | 66.38                                 | 61.58      | 154.14                                |
|                                                               |                     | Zm00001d015091 | Bax inhibitor 1                                    | 124.55                                | 83.38      | 314.62                                |
|                                                               |                     | Zm00001d044389 | calcineurin B-like5                                | 22.54                                 | 25.71      | 144.21                                |
|                                                               |                     | Zm00001d002540 | calcium dependent protein kinase5                  | 65.34                                 | 51.94      | 103.99                                |
|                                                               |                     | Zm00001d044516 | DCD (Development and Cell Death) domain protein    | 79.97                                 | 76.84      | 146.37                                |
|                                                               |                     | Zm00001d038999 | drought-induced 19                                 | 301.31                                | 185.01     | 517.20                                |
|                                                               |                     | Zm00001d028966 | ELMO/CED-12 family protein                         | 70.13                                 | 69.56      | 155.94                                |
|                                                               |                     | Zm00001d022461 | ERF-like protein                                   | 13.31                                 | 10.25      | 170.67                                |
|                                                               |                     | Zm00001d040651 | Ethylene-responsive transcription factor RAP2-2    | 22.68                                 | 17.08      | 107.85                                |
|                                                               |                     | Zm00001d042096 | Glutathione S-transferase U16                      | 66.46                                 | 50.87      | 110.59                                |
|                                                               |                     | Zm00001d027557 | glutathione transferase31                          | 13.16                                 | 10.50      | 123.40                                |
|                                                               |                     | Zm00001d034356 | glutathione transferase5                           | 88.58                                 | 79.89      | 188.49                                |
|                                                               |                     | Zm00001d018809 | glutathione transferase6                           | 56.27                                 | 41.15      | 126.00                                |
|                                                               |                     | Zm00001d024778 | Hydrophobic protein RCI2B                          | 403.78                                | 285.45     | 1045.20                               |
|                                                               |                     | Zm00001d018973 | IAA24-auxin-responsive Aux/IAA family member       | 30.90                                 | 27.88      | 87.24                                 |
|                                                               |                     | Zm00001d045298 | Lipase-like                                        | 56.03                                 | 54.46      | 98.77                                 |
|                                                               |                     | Zm00001d011638 | Lipid phosphate phosphatase 2                      | 14.77                                 | 34.87      | 101.74                                |
|                                                               |                     | Zm00001d049954 | Monodehydroascorbate reductase 1 peroxisomal       | 84.94                                 | 105.90     | 220.10                                |
|                                                               |                     | Zm00001d019207 | NAC domain-containing protein 2                    | 14.46                                 | 14.70      | 83.70                                 |

|            |                                      |                |                                                                  |        |        |         |
|------------|--------------------------------------|----------------|------------------------------------------------------------------|--------|--------|---------|
|            |                                      | Zm00001d014608 | Peroxidase 16                                                    | 40.41  | 20.49  | 117.40  |
|            |                                      | Zm00001d010478 | Peroxisomal adenine nucleotide carrier 1                         | 33.27  | 32.48  | 99.53   |
|            |                                      | Zm00001d007037 | Probable mediator of RNA polymerase II transcription subunit 26b | 25.82  | 21.64  | 74.64   |
|            |                                      | Zm00001d018668 | Protein C2-DOMAIN ABA-RELATED 4                                  | 173.47 | 120.10 | 265.33  |
|            |                                      | Zm00001d005193 | Protein LURP1                                                    | 44.85  | 38.38  | 83.92   |
|            |                                      | Zm00001d021413 | Protein PIN-LIKES 7                                              | 60.88  | 47.64  | 180.18  |
|            |                                      | Zm00001d022139 | Protein TIFY 10B                                                 | 164.63 | 83.96  | 300.88  |
|            |                                      | Zm00001d006860 | Protein TIFY 10B                                                 | 46.74  | 36.28  | 86.72   |
|            |                                      | Zm00001d009103 | Putative AP2/EREBP transcription factor superfamily protein      | 108.19 | 79.84  | 474.03  |
|            |                                      | Zm00001d025081 | Rhodanese-like domain-containing protein 19 mitochondrial        | 150.25 | 111.85 | 353.51  |
|            |                                      | Zm00001d013005 | RING/U-box superfamily protein                                   | 42.20  | 38.90  | 87.26   |
|            |                                      | Zm00001d039407 | Shaggy-related protein kinase iota                               | 38.36  | 38.59  | 85.28   |
|            |                                      | Zm00001d039052 | Sugar transporter ERD6-like 6                                    | 67.68  | 55.00  | 120.20  |
|            |                                      | Zm00001d041716 | Syntaxin-132                                                     | 24.45  | 30.85  | 88.42   |
| GO:0009414 | <i>response to water deprivation</i> | Zm00001d017762 | abscisic acid 8'-hydroxylase 1                                   | 16.20  | 16.13  | 32.60   |
|            |                                      | Zm00001d004731 | Aldehyde dehydrogenase                                           | 19.09  | 25.93  | 61.10   |
|            |                                      | Zm00001d026191 | AP2-EREBP transcription factor                                   | 2.39   | 1.54   | 5.40    |
|            |                                      | Zm00001d044285 | calcineurin B-like 10                                            | 43.97  | 30.00  | 65.20   |
|            |                                      | Zm00001d044389 | calcineurin B-like 5                                             | 22.54  | 25.71  | 144.21  |
|            |                                      | Zm00001d002540 | calcium dependent protein kinase 5                               | 65.34  | 51.94  | 103.99  |
|            |                                      | Zm00001d007097 | Early response to dehydration 15-like protein                    | 10.16  | 4.13   | 25.72   |
|            |                                      | Zm00001d027557 | glutathione S-transferase subunit 31                             | 13.16  | 10.50  | 123.40  |
|            |                                      | Zm00001d034356 | glutathione transferase 5                                        | 88.58  | 79.89  | 188.49  |
|            |                                      | Zm00001d018809 | glutathione transferase 6                                        | 56.27  | 41.15  | 126.00  |
|            |                                      | Zm00001d008795 | Glycosyltransferase                                              | 4.32   | 3.54   | 12.85   |
|            |                                      | Zm00001d021168 | Glycosyltransferase                                              | 0.24   | 0.66   | 13.55   |
|            |                                      | Zm00001d020714 | HSF transcription factor                                         | 0.79   | 0.51   | 5.01    |
|            |                                      | Zm00001d006016 | Multiple stress-responsive zinc-finger protein ISAP1             | 9.48   | 4.37   | 31.42   |
|            |                                      | Zm00001d042609 | NAC domain-containing protein 48                                 | 19.94  | 15.22  | 45.13   |
|            |                                      | Zm00001d024778 | NaCl stress protein 1                                            | 403.78 | 285.45 | 1045.20 |

|            |                                    |                |                                                             |        |        |        |
|------------|------------------------------------|----------------|-------------------------------------------------------------|--------|--------|--------|
|            |                                    | Zm00001d036879 | Non-specific serine/threonine protein kinase                | 14.38  | 19.12  | 37.30  |
|            |                                    | Zm00001d032155 | Non-specific serine/threonine protein kinase                | 4.91   | 3.01   | 12.15  |
|            |                                    | Zm00001d010478 | Peroxisomal carrier protein                                 | 33.27  | 32.48  | 99.53  |
|            |                                    | Zm00001d029397 | phospholipase D7                                            | 1.73   | 4.81   | 20.23  |
|            |                                    | Zm00001d010399 | Putative WRKY DNA-binding domain superfamily protein        | 12.08  | 9.43   | 28.99  |
|            |                                    | Zm00001d049173 | Putative WRKY DNA-binding domain superfamily protein        | 0.13   | 0.14   | 3.60   |
|            |                                    | Zm00001d025545 | Zeaxanthin epoxidase, chloroplastic                         | 7.00   | 7.66   | 21.20  |
| GO:0009607 | <i>response to biotic stimulus</i> | Zm00001d011208 | 1-aminocyclopropane-1-carboxylate oxidase 1                 | 187.99 | 115.85 | 438.95 |
|            |                                    | Zm00001d024843 | 1-aminocyclopropane-1-carboxylate oxidase15                 | 1.23   | 0.79   | 3.09   |
|            |                                    | Zm00001d024853 | 1-aminocyclopropane-1-carboxylate oxidase15                 | 2.97   | 4.31   | 13.16  |
|            |                                    | Zm00001d017762 | abscisic acid 8'-hydroxylase1                               | 16.20  | 16.13  | 32.56  |
|            |                                    | Zm00001d047942 | Actin-depolymerizing factor 5                               | 28.90  | 20.46  | 43.68  |
|            |                                    | Zm00001d014692 | AIG2-like protein                                           | 22.09  | 17.91  | 37.28  |
|            |                                    | Zm00001d052485 | AMP-binding protein                                         | 9.62   | 8.50   | 23.88  |
|            |                                    | Zm00001d026271 | AP2/EREBP putative transcription factor superfamily protein | 0.03   | 0.00   | 0.73   |
|            |                                    | Zm00001d026191 | AP2-EREBP transcription factor                              | 2.39   | 1.54   | 5.39   |
|            |                                    | Zm00001d037941 | AP2-EREBP transcription factor                              | 30.89  | 22.62  | 61.48  |
|            |                                    | Zm00001d016456 | ARID transcription factor                                   | 4.41   | 3.19   | 9.51   |
|            |                                    | Zm00001d017912 | ASC1-like protein 2                                         | 32.46  | 40.76  | 84.04  |
|            |                                    | Zm00001d033981 | ATP sulfurylase1                                            | 12.96  | 11.50  | 29.84  |
|            |                                    | Zm00001d044095 | Carbonic anhydrase                                          | 2.80   | 1.54   | 6.28   |
|            |                                    | Zm00001d025753 | chitinase B1                                                | 1.12   | 0.27   | 2.83   |
|            |                                    | Zm00001d053432 | Cytochrome b6-f complex iron-sulfur subunit                 | 0.59   | 0.92   | 13.27  |
|            |                                    | Zm00001d012322 | Cytochrome P450 CYP81A1                                     | 0.12   | 0.41   | 9.41   |
|            |                                    | Zm00001d009666 | Dihydroflavonol-4-reductase                                 | 3.52   | 4.24   | 29.04  |
|            |                                    | Zm00001d007097 | Early response to dehydration 15-like protein               | 10.16  | 4.13   | 25.72  |
|            |                                    | Zm00001d033906 | Endoplasmic oxidoreductin-1                                 | 21.63  | 26.39  | 70.87  |
|            |                                    | Zm00001d035854 | Fatty acid alpha-dioxygenase                                | 0.60   | 2.97   | 39.62  |
|            |                                    | Zm00001d023830 | Fiber protein Fb19                                          | 46.74  | 41.32  | 113.20 |
|            |                                    | Zm00001d019277 | Flower-specific gamma-thionin                               | 6.58   | 4.45   | 17.84  |

|  |                |                                                                                |       |       |        |
|--|----------------|--------------------------------------------------------------------------------|-------|-------|--------|
|  | Zm00001d049926 | Gibberellin 20 oxidase 2                                                       | 0.26  | 0.14  | 7.49   |
|  | Zm00001d039642 | Glycosyltransferase                                                            | 1.54  | 3.98  | 20.37  |
|  | Zm00001d043166 | Glycosyltransferase                                                            | 2.91  | 2.16  | 5.80   |
|  | Zm00001d020714 | HSF transcription factor                                                       | 0.79  | 0.51  | 5.01   |
|  | Zm00001d036073 | Hypersensitive-induced reaction protein 4                                      | 28.55 | 31.72 | 60.24  |
|  | Zm00001d021843 | Low-molecular-weight cysteine-rich protein LCR70                               | 11.91 | 7.86  | 114.95 |
|  | Zm00001d040468 | major facilitator superfamily defense 1 related to integral membrane permeases | 1.92  | 0.72  | 3.94   |
|  | Zm00001d010271 | MED26 transcription factor                                                     | 18.58 | 19.10 | 49.63  |
|  | Zm00001d022314 | MED26 transcription factor                                                     | 2.95  | 2.20  | 9.92   |
|  | Zm00001d042609 | NAC domain-containing protein 48                                               | 19.94 | 15.22 | 45.13  |
|  | Zm00001d012527 | NAC transcription factor                                                       | 7.70  | 4.04  | 52.29  |
|  | Zm00001d017025 | Nitrate reductase                                                              | 0.22  | 0.11  | 1.15   |
|  | Zm00001d028733 | Non-specific serine/threonine protein kinase                                   | 14.88 | 17.87 | 39.01  |
|  | Zm00001d026649 | opaque endosperm7: like o1; high lysine content                                | 8.60  | 7.65  | 22.46  |
|  | Zm00001d031267 | Oxidoreductase                                                                 | 28.45 | 32.59 | 148.89 |
|  | Zm00001d028815 | Pathogenesis-related protein 10                                                | 36.25 | 24.66 | 83.56  |
|  | Zm00001d032992 | Pectinesterase                                                                 | 30.66 | 35.19 | 83.31  |
|  | Zm00001d010218 | Peroxidase                                                                     | 0.15  | 0.24  | 9.60   |
|  | Zm00001d014341 | Peroxidase                                                                     | 2.50  | 2.20  | 6.14   |
|  | Zm00001d010478 | Peroxisomal carrier protein                                                    | 33.27 | 32.48 | 99.53  |
|  | Zm00001d007765 | Prolyl 4-hydroxylase 4                                                         | 24.98 | 13.05 | 80.74  |
|  | Zm00001d018526 | Prolyl 4-hydroxylase 8                                                         | 27.89 | 29.78 | 63.76  |
|  | Zm00001d005018 | Protein DETOXIFICATION                                                         | 10.85 | 8.30  | 28.30  |
|  | Zm00001d015964 | Protein DETOXIFICATION                                                         | 3.48  | 2.78  | 9.34   |
|  | Zm00001d053087 | Putative D-mannose binding lectin receptor-like protein kinase family protein  | 4.11  | 2.50  | 9.03   |
|  | Zm00001d023669 | Putative NAC domain transcription factor superfamily protein                   | 11.45 | 10.36 | 26.46  |
|  | Zm00001d046261 | Putative thaumatin domain family protein                                       | 1.64  | 1.42  | 7.40   |
|  | Zm00001d050164 | Putative WAK-related receptor-like protein kinase family protein               | 0.66  | 0.25  | 1.47   |
|  | Zm00001d010399 | Putative WRKY DNA-binding domain superfamily protein                           | 12.08 | 9.43  | 28.99  |
|  | Zm00001d010617 | Putative WRKY DNA-binding domain superfamily protein                           | 5.11  | 4.03  | 15.53  |

|                                                                 |                           | Zm00001d008651 | Pyruvate decarboxylase                                        | 2.14                                  | 4.90        | 53.34                                 |
|-----------------------------------------------------------------|---------------------------|----------------|---------------------------------------------------------------|---------------------------------------|-------------|---------------------------------------|
|                                                                 |                           | Zm00001d028759 | Pyruvate decarboxylase                                        | 230.40                                | 224.75      | 589.37                                |
|                                                                 |                           | Zm00001d010588 | pyruvate decarboxylase1                                       | 105.13                                | 73.74       | 274.49                                |
|                                                                 |                           | Zm00001d052653 | respiratory burst oxidase4                                    | 7.61                                  | 6.70        | 23.15                                 |
|                                                                 |                           | Zm00001d012221 | stearoyl-acyl-carrier-protein desaturase9                     | 47.49                                 | 41.20       | 124.84                                |
|                                                                 |                           | Zm00001d035066 | STIP1 homology and U box-containing protein 1                 | 12.35                                 | 10.80       | 24.79                                 |
|                                                                 |                           | Zm00001d009990 | Superoxide dismutase                                          | 167.60                                | 183.97      | 346.11                                |
|                                                                 |                           | Zm00001d022139 | TIFY27                                                        | 164.63                                | 83.96       | 300.88                                |
|                                                                 |                           | Zm00001d007357 | Transport inhibitor response 1 protein                        | 19.73                                 | 16.28       | 35.10                                 |
|                                                                 |                           | Zm00001d018969 | tryptophan synthase alpha subunit1                            | 26.28                                 | 27.77       | 54.56                                 |
|                                                                 |                           | Zm00001d002896 | TUB-transcription factor 4                                    | 4.39                                  | 4.77        | 16.11                                 |
|                                                                 |                           | Zm00001d009118 | Universal stress protein                                      | 113.53                                | 77.27       | 699.62                                |
|                                                                 |                           | Zm00001d052776 | VAMP protein SEC22                                            | 2.86                                  | 2.13        | 8.13                                  |
|                                                                 |                           | Zm00001d053746 | WRKY71-superfamily of TFs having WRKY and zinc finger domains | 2.85                                  | 1.51        | 10.55                                 |
|                                                                 |                           | Zm00001d020136 | WRKY74-superfamily of TFs having WRKY and zinc finger domains | 6.21                                  | 3.08        | 11.11                                 |
|                                                                 |                           | Zm00001d042055 | Zea mays ARGOS6                                               | 16.03                                 | 11.31       | 37.84                                 |
| CLUSTER 6: genes down-regulated by NH <sub>4</sub> <sup>+</sup> |                           |                |                                                               |                                       |             |                                       |
| GO ID                                                           | GO enriched term          | Gene ID        | Gene Description                                              | RPKM<br>+NO <sub>3</sub> <sup>-</sup> | RPKM -<br>N | RPKM<br>+NH <sub>4</sub> <sup>+</sup> |
| GO:0008283                                                      | <i>cell proliferation</i> | Zm00001d012166 | Faciata 1-like protein                                        | 6.89                                  | 8.13        | 3.52                                  |
|                                                                 |                           | Zm00001d018415 | Proliferating cell nuclear antigen                            | 72.96                                 | 78.34       | 39.10                                 |

**Table S5:** List of representative genes from selected GO terms overrepresented among DEGs specifically responsive to NO<sub>3</sub><sup>-</sup>. RPKM: Reads Per Kb per Million.

| CLUSTER 5: genes up-regulated by NO <sub>3</sub> <sup>-</sup>   |                                           |                |                                                                                 |                                       |            |                                       |
|-----------------------------------------------------------------|-------------------------------------------|----------------|---------------------------------------------------------------------------------|---------------------------------------|------------|---------------------------------------|
| GO ID                                                           | GO enriched term                          | Gene ID        | Gene Description                                                                | RPKM<br>+NO <sub>3</sub> <sup>-</sup> | RPKM<br>-N | RPKM<br>+NH <sub>4</sub> <sup>+</sup> |
| GO:0048046                                                      | apoplast                                  | Zm00001d004443 | Mannitol dehydrogenase                                                          | 2.80                                  | 0.97       | 0.58                                  |
|                                                                 |                                           | Zm00001d005472 | Dirigent protein                                                                | 44.75                                 | 25.31      | 26.45                                 |
|                                                                 |                                           | Zm00001d038049 | Lichenase-2                                                                     | 19.76                                 | 10.44      | 13.01                                 |
|                                                                 |                                           | Zm00001d046357 | Beta-galactosidase                                                              | 52.40                                 | 32.83      | 24.62                                 |
|                                                                 |                                           | Zm00001d047775 | Dirigent protein                                                                | 19.55                                 | 8.08       | 12.20                                 |
|                                                                 |                                           | Zm00001d048669 | Auxin-induced beta-glucosidase                                                  | 9.67                                  | 5.14       | 4.82                                  |
|                                                                 |                                           | Zm00001d052336 | Peroxidase                                                                      | 60.22                                 | 39.95      | 38.00                                 |
|                                                                 |                                           | Zm00001d052585 | Dirigent protein                                                                | 46.70                                 | 1.53       | 1.45                                  |
|                                                                 |                                           | Zm00001d053585 | Beta-galactosidase                                                              | 7.21                                  | 4.36       | 5.22                                  |
| GO:0030247                                                      | polysaccharide binding                    | Zm00001d038049 | Lichenase-2                                                                     | 19.76                                 | 10.4       | 13.0                                  |
|                                                                 |                                           | Zm00001d043361 | Glucan endo-1,3-beta-glucosidase 1                                              | 38.72                                 | 24.2       | 17.2                                  |
| CLUSTER 7: genes down-regulated by NO <sub>3</sub> <sup>-</sup> |                                           |                |                                                                                 |                                       |            |                                       |
| GO ID                                                           | GO enriched term                          | Gene ID        | Gene Description                                                                | RPKM<br>+NO <sub>3</sub> <sup>-</sup> | RPKM<br>-N | RPKM<br>+NH <sub>4</sub> <sup>+</sup> |
| GO:0044550                                                      | secondary metabolite biosynthetic process | Zm00001d017077 | red aleurone1: changes purple aleurone to red; encodes flavonoid 3'-hydroxylase | 4.71                                  | 10.59      | 8.57                                  |
|                                                                 |                                           | Zm00001d017279 | phenylalanine ammonia lyase7                                                    | 2.71                                  | 6.61       | 7.49                                  |
|                                                                 |                                           | Zm00001d018791 | Anther-specific proline-rich protein APG                                        | 0.64                                  | 2.03       | 1.60                                  |
|                                                                 |                                           | Zm00001d023258 | Calcium-transporting ATPase                                                     | 9.10                                  | 13.72      | 16.97                                 |
|                                                                 |                                           | Zm00001d024763 | 3-N-debenzoyl-2-deoxytaxol N-benzoyltransferase                                 | 75.08                                 | 142.23     | 137.22                                |
|                                                                 |                                           | Zm00001d035115 | multidrug and toxic compound extrusion1: confers aluminum tolerance             | 14.06                                 | 49.09      | 129.60                                |
|                                                                 |                                           | Zm00001d045043 | Mannitol dehydrogenase                                                          | 28.51                                 | 50.39      | 72.22                                 |
|                                                                 |                                           | Zm00001d046493 | heme oxygenase3: encodes a heme oxygenase                                       | 5.81                                  | 12.56      | 13.16                                 |

|            |                                       |                |                                              |        |        |        |
|------------|---------------------------------------|----------------|----------------------------------------------|--------|--------|--------|
|            |                                       | Zm00001d048814 | Dirigent protein                             | 1.21   | 4.33   | 3.30   |
| GO:0098655 | <i>cation transmembrane transport</i> | Zm00001d034782 | Ammonium transporter                         | 2.95   | 8.57   | 8.49   |
|            |                                       | Zm00001d025831 | ammonium transporter1                        | 3.91   | 8.72   | 19.41  |
|            |                                       | Zm00001d017249 | ammonium transporter2                        | 0.64   | 2.81   | 3.23   |
|            |                                       | Zm00001d023258 | Calcium-transporting ATPase                  | 9.10   | 13.72  | 16.97  |
|            |                                       | Zm00001d018799 | Non-specific serine/threonine protein kinase | 69.05  | 109.51 | 186.54 |
|            |                                       | Zm00001d002006 | Plasma membrane ATPase                       | 271.85 | 506.21 | 718.06 |
|            |                                       | Zm00001d003861 | Potassium transporter                        | 21.24  | 57.80  | 55.67  |
|            |                                       | Zm00001d020325 | Potassium transporter                        | 32.55  | 49.22  | 43.96  |
|            |                                       | Zm00001d022485 | Potassium transporter                        | 6.02   | 10.60  | 14.65  |

**Table S6:** List of representative genes from selected GO terms overrepresented among DEGs specifically responsive to both  $\text{NH}_4^+$  and  $\text{NO}_3^-$ .  
RPKM: Reads Per Kb per Million.

| CLUSTER 2;3: genes up-regulated by both NO <sub>3</sub> <sup>-</sup> and NH <sub>4</sub> <sup>+</sup> |                     |                |                                                         |                                       |            |                                       |
|-------------------------------------------------------------------------------------------------------|---------------------|----------------|---------------------------------------------------------|---------------------------------------|------------|---------------------------------------|
| GO ID                                                                                                 | GO enriched term    | Gene ID        | Gene Description                                        | RPKM<br>+NO <sub>3</sub> <sup>-</sup> | RPKM<br>-N | RPKM<br>+NH <sub>4</sub> <sup>+</sup> |
| GO:0009725                                                                                            | response to hormone | Zm00001d006119 | 2Fe-2S ferredoxin-like superfamily protein              | 10.91                                 | 3.15       | 6.39                                  |
|                                                                                                       |                     | Zm00001d023779 | 3-hydroxyisobutyryl-CoA hydrolase 1                     | 42.60                                 | 26.62      | 42.44                                 |
|                                                                                                       |                     | Zm00001d003209 | AAA-ATPase ASD mitochondrial                            | 7.31                                  | 3.62       | 9.91                                  |
|                                                                                                       |                     | Zm00001d053396 | Absciscic acid receptor PYL9                            | 12.65                                 | 7.08       | 13.44                                 |
|                                                                                                       |                     | Zm00001d033167 | ACT domain-containing protein ACR4                      | 20.05                                 | 11.39      | 25.19                                 |
|                                                                                                       |                     | Zm00001d025047 | APx3-Peroxisomal Ascorbate Peroxidase                   | 15.78                                 | 7.62       | 21.16                                 |
|                                                                                                       |                     | Zm00001d029475 | ATP-dependent protease La (LON) domain protein          | 3.07                                  | 1.14       | 3.11                                  |
|                                                                                                       |                     | Zm00001d041056 | Auxin response factor 2                                 | 2.11                                  | 0.53       | 1.30                                  |
|                                                                                                       |                     | Zm00001d033711 | Basic blue protein                                      | 23.22                                 | 10.14      | 16.24                                 |
|                                                                                                       |                     | Zm00001d053952 | Bax inhibitor 1                                         | 27.13                                 | 15.56      | 35.33                                 |
|                                                                                                       |                     | Zm00001d007718 | benzoxazinone synthesis13                               | 54.64                                 | 12.39      | 55.50                                 |
|                                                                                                       |                     | Zm00001d043389 | CBL-interacting serine/threonine-protein kinase 18      | 19.80                                 | 12.38      | 23.69                                 |
|                                                                                                       |                     | Zm00001d048460 | CBL-interacting serine/threonine-protein kinase 9       | 8.42                                  | 5.23       | 11.88                                 |
|                                                                                                       |                     | Zm00001d017547 | Dehydrin COR410                                         | 17.32                                 | 3.89       | 11.54                                 |
|                                                                                                       |                     | Zm00001d034160 | DNA binding protein                                     | 38.28                                 | 25.24      | 50.37                                 |
|                                                                                                       |                     | Zm00001d029102 | Dormancy-associated protein homolog 3                   | 20.57                                 | 12.35      | 20.50                                 |
|                                                                                                       |                     | Zm00001d032295 | DRE-binding protein 1                                   | 8.55                                  | 2.23       | 8.50                                  |
|                                                                                                       |                     | Zm00001d021141 | Ferredoxin                                              | 13.59                                 | 4.18       | 9.06                                  |
|                                                                                                       |                     | Zm00001d034345 | Ferredoxin--NADP reductase root isozyme 1 chloroplastic | 110.23                                | 52.27      | 83.73                                 |
|                                                                                                       |                     | Zm00001d019985 | GDSL esterase/lipase                                    | 5.80                                  | 2.88       | 4.60                                  |
|                                                                                                       |                     | Zm00001d013222 | Gibberellin-regulated protein 10                        | 40.06                                 | 25.49      | 43.96                                 |
|                                                                                                       |                     | Zm00001d048354 | Glutathione S-transferase F9                            | 27.14                                 | 17.01      | 29.42                                 |



|  |                |                                                                                       |       |       |       |
|--|----------------|---------------------------------------------------------------------------------------|-------|-------|-------|
|  | Zm00001d043795 | Glutathione S-transferase GSTU6                                                       | 52.62 | 27.30 | 53.63 |
|  | Zm00001d029708 | glutathione transferase30                                                             | 5.08  | 1.38  | 4.91  |
|  | Zm00001d042104 | glutathione transferase7                                                              | 6.09  | 3.05  | 8.34  |
|  | Zm00001d046472 | Hemoglobin-like protein HbO                                                           | 39.46 | 27.79 | 54.05 |
|  | Zm00001d048950 | Hevein-like preproprotein                                                             | 4.14  | 1.33  | 4.08  |
|  | Zm00001d005867 | HVA22-like protein d                                                                  | 6.48  | 2.62  | 5.91  |
|  | Zm00001d011753 | HVA22-like protein f                                                                  | 6.64  | 2.39  | 8.40  |
|  | Zm00001d024546 | late hypocotyl elongation protein ortholog1: myb transcription factor-core clock gene | 4.93  | 2.67  | 3.90  |
|  | Zm00001d035756 | Leucine-rich repeat (LRR) family protein                                              | 6.14  | 1.35  | 10.20 |
|  | Zm00001d004706 | Lipase-like PAD4                                                                      | 3.91  | 1.50  | 3.00  |
|  | Zm00001d041204 | lipoxygenase12                                                                        | 20.01 | 7.24  | 17.55 |
|  | Zm00001d029506 | LOB domain-containing protein 42                                                      | 8.39  | 3.84  | 11.74 |
|  | Zm00001d029963 | myb-like transcription factor family protein                                          | 31.60 | 17.83 | 41.44 |
|  | Zm00001d047441 | NADPH:quinone oxidoreductase                                                          | 72.92 | 29.46 | 98.79 |
|  | Zm00001d029529 | Ninja-family protein AFP3                                                             | 25.40 | 12.83 | 20.14 |
|  | Zm00001d048947 | pathogenesis-related protein3                                                         | 15.88 | 4.25  | 13.19 |
|  | Zm00001d027727 | Phosphoserine aminotransferase 1 chloroplastic                                        | 67.74 | 43.64 | 86.69 |
|  | Zm00001d038741 | Pistil-specific extensin-like protein                                                 | 13.33 | 2.19  | 10.22 |
|  | Zm00001d018857 | Probable carboxylesterase 15                                                          | 6.27  | 1.60  | 6.93  |
|  | Zm00001d010284 | Probable carboxylesterase 17                                                          | 7.27  | 2.51  | 4.74  |
|  | Zm00001d038178 | Probable carboxylesterase 17                                                          | 2.78  | 0.66  | 1.63  |
|  | Zm00001d001774 | Probable CCR4-associated factor 1 homolog 11                                          | 2.20  | 0.39  | 3.43  |
|  | Zm00001d009700 | Probable desiccation-related protein LEA14                                            | 73.87 | 44.62 | 76.93 |
|  | Zm00001d022122 | Probable GTP diphosphokinase RSH2 chloroplastic                                       | 2.02  | 0.97  | 1.67  |
|  | Zm00001d002564 | Protein DMR6-LIKE OXYGENASE 2                                                         | 1.59  | 0.30  | 1.26  |
|  | Zm00001d029932 | Protein NRT1/ PTR FAMILY 6.3                                                          | 27.36 | 17.76 | 22.71 |
|  | Zm00001d016119 | Protein SOMBRERO                                                                      | 4.77  | 1.17  | 2.84  |
|  | Zm00001d005813 | Protein TIFY 10B                                                                      | 1.58  | 0.32  | 0.85  |
|  | Zm00001d027900 | Protein TIFY 10B                                                                      | 2.24  | 0.63  | 4.33  |
|  | Zm00001d026139 | Putative calcium-dependent protein kinase family protein                              | 4.97  | 2.28  | 6.15  |

|  |                |                                                      |        |        |        |
|--|----------------|------------------------------------------------------|--------|--------|--------|
|  | Zm00001d038300 | Putative cytochrome P450 superfamily protein         | 5.01   | 2.23   | 8.17   |
|  | Zm00001d051891 | Putative LOB domain-containing family protein        | 4.96   | 1.99   | 3.21   |
|  | Zm00001d023402 | Putative MYB DNA-binding domain superfamily protein  | 1.68   | 0.41   | 1.32   |
|  | Zm00001d017964 | Putative RNA-dependent RNA polymerase                | 3.20   | 1.83   | 3.12   |
|  | Zm00001d038843 | Putative WRKY DNA-binding domain superfamily protein | 6.15   | 2.40   | 10.05  |
|  | Zm00001d017786 | putidaredoxin reductase homolog1                     | 3.94   | 1.95   | 6.45   |
|  | Zm00001d022628 | R2R3MYB-domain protein                               | 42.41  | 25.92  | 36.09  |
|  | Zm00001d021839 | Remorin family protein                               | 35.06  | 21.92  | 44.55  |
|  | Zm00001d040445 | RING/U-box superfamily protein                       | 10.74  | 5.08   | 8.22   |
|  | Zm00001d032550 | RNA-binding protein                                  | 8.92   | 4.56   | 11.79  |
|  | Zm00001d010751 | Seed specific protein Bn15D17A                       | 6.44   | 2.17   | 5.52   |
|  | Zm00001d038717 | Seed specific protein Bn15D17A                       | 7.71   | 3.31   | 9.23   |
|  | Zm00001d026632 | Stem-specific protein TSJT1                          | 38.64  | 11.95  | 56.70  |
|  | Zm00001d035683 | Subtilisin-chymotrypsin inhibitor CI-1               | 318.75 | 198.12 | 455.65 |
|  | Zm00001d023677 | sugars will eventually be exported transporter13a    | 23.40  | 14.00  | 18.24  |
|  | Zm00001d050577 | sugars will eventually be exported transporter15a    | 1.90   | 0.21   | 0.96   |
|  | Zm00001d014793 | thick tassel dwarf1                                  | 1.70   | 0.75   | 1.33   |
|  | Zm00001d022277 | tolB protein-related                                 | 3.40   | 1.37   | 5.21   |
|  | Zm00001d011778 | tonoplast intrinsic protein1                         | 8.91   | 2.80   | 8.01   |
|  | Zm00001d052254 | Transcription factor PRE3                            | 6.64   | 2.72   | 7.45   |
|  | Zm00001d042463 | Two-component response regulator ARR11               | 14.91  | 7.33   | 12.50  |
|  | Zm00001d044106 | UDP-glycosyltransferase 73B3                         | 1.58   | 0.35   | 2.93   |
|  | Zm00001d033980 | ustilago maydis induced12                            | 6.86   | 3.19   | 11.28  |
|  | Zm00001d013705 | VAN3-binding protein                                 | 3.14   | 1.40   | 2.54   |
|  | Zm00001d018195 | WAT1-related protein                                 | 19.85  | 9.48   | 28.10  |
|  | Zm00001d033284 | WAT1-related protein                                 | 12.09  | 6.03   | 9.75   |
|  | Zm00001d036440 | WAT1-related protein                                 | 19.44  | 9.44   | 17.29  |
|  | Zm00001d009309 | Xyloglucan endotransglucosylase/hydrolase protein 14 | 12.81  | 5.75   | 10.56  |
|  | Zm00001d014613 | Xyloglucan endotransglucosylase/hydrolase protein 23 | 22.64  | 12.36  | 29.13  |

| CLUSTER 8: genes down-regulated by both NO <sub>3</sub> <sup>-</sup> and NH <sub>4</sub> <sup>+</sup> |                                           |                |                              |                                       |            |                                       |
|-------------------------------------------------------------------------------------------------------|-------------------------------------------|----------------|------------------------------|---------------------------------------|------------|---------------------------------------|
| GO ID                                                                                                 | GO enriched term                          | Gene ID        | Gene Description             | RPKM<br>+NO <sub>3</sub> <sup>-</sup> | RPKM<br>-N | RPKM<br>+NH <sub>4</sub> <sup>+</sup> |
| GO:0005200                                                                                            | structural constituent of cytoskeleton    | Zm00001d040509 | beta tubulin5                | 166.29                                | 365.37     | 230.50                                |
|                                                                                                       |                                           | Zm00001d006651 | Tubulin alpha chain          | 164.52                                | 276.36     | 148.24                                |
|                                                                                                       |                                           | Zm00001d021891 | Tubulin alpha chain          | 392.24                                | 642.07     | 403.73                                |
|                                                                                                       |                                           | Zm00001d008216 | Tubulin beta chain           | 37.58                                 | 57.19      | 36.44                                 |
| GO:0072593                                                                                            | reactive oxygen species metabolic process | Zm00001d033751 | Dynamamin-related protein 1C | 43.50                                 | 65.80      | 38.33                                 |
|                                                                                                       |                                           | Zm00001d040364 | Peroxidase                   | 424.76                                | 889.51     | 498.52                                |
|                                                                                                       |                                           | Zm00001d038598 | Peroxidase                   | 55.45                                 | 136.74     | 70.91                                 |
|                                                                                                       |                                           | Zm00001d022283 | Peroxidase                   | 6.84                                  | 62.69      | 27.63                                 |
|                                                                                                       |                                           | Zm00001d050572 | Peroxidase                   | 22.99                                 | 59.47      | 35.58                                 |
|                                                                                                       |                                           | Zm00001d022280 | Peroxidase                   | 5.50                                  | 39.74      | 19.56                                 |
|                                                                                                       |                                           | Zm00001d010924 | Peroxidase                   | 17.32                                 | 29.21      | 23.21                                 |
|                                                                                                       |                                           | Zm00001d045845 | Peroxidase                   | 6.19                                  | 15.92      | 10.62                                 |
|                                                                                                       |                                           | Zm00001d045846 | Peroxidase                   | 3.17                                  | 15.71      | 7.25                                  |
|                                                                                                       |                                           | Zm00001d022281 | Peroxidase                   | 3.04                                  | 9.54       | 6.07                                  |
|                                                                                                       |                                           | Zm00001d028348 | Peroxidase                   | 0.28                                  | 3.67       | 1.29                                  |
|                                                                                                       |                                           | Zm00001d026357 | Peroxidase                   | 0.15                                  | 1.59       | 1.00                                  |
|                                                                                                       |                                           | Zm00001d014603 | Peroxidase                   | 0.27                                  | 1.35       | 0.95                                  |
